# Supplementary material for: Mesenchymal stem cells and oncolytic viruses: joining forces against cancer
Source: PubMed Central journal article supplement — J Immunother Cancer. 2021 Feb 8;9(2):e001684. doi: 10.1136/jitc-2020-001684 (PMC7871674; doi:10.1136/jitc-2020-001684), 2021-02-08
Supplement: jitc-2020-001684supp001.pdf [file jitc-2020-001684supp001.pdf]

Table 1 Preclinical studies using OV-loaded human MSCs for cancer treatment

| MSCs source | Oncolytic Virus            | Transgene/modification                                                                                                 | Model                                                           | Cell line               | Route         | Outcomes                                                                                                                                                                         | Reference                      |
|-------------|----------------------------|------------------------------------------------------------------------------------------------------------------------|-----------------------------------------------------------------|-------------------------|---------------|----------------------------------------------------------------------------------------------------------------------------------------------------------------------------------|--------------------------------|
| BM-MSCs     | MYXV (vMyx-IL15Ra-tdTr)    | IL-15                                                                                                                  | Lung melanoma/C57BL/6 mice                                      | B16-F10                 | iv x2         | Correct viral infection and progeny production<br>Strong anti-tumor effect                                                                                                       | Jazowiecka-Rakus et al. (2020) |
| BM-MSCs     | Ad (oAd/RLX-PCDP)          | relaxin/polymer PCDP                                                                                                   | Pancreatic xenograft/nude mice                                  | AsPC-1                  | iv x3         | Production of pro-inflammatory cytokines and tumor infiltration of effector T cells<br>Correct viral infection and progeny production                                            | Na et al. (2019)               |
| BM-MSCs     | Ad (oAd-WNT1)              | Wnt-inhibiting decoy receptor (WNT1)                                                                                   | Orthotopic hepatocellular carcinoma/nude mice                   | Hep3B                   | iv x2         | Higher antitumor effect than naked OAd<br>Correct viral infection and progeny production                                                                                         | Yoon et al. (2019)             |
| MenSCs      | Ad (CRAAd5/F11)            | Type 11 adenovirus fiber                                                                                               | Colorectal cancer xenograft/nude mice                           | SW620                   | iv x2         | MSCs improve OAdv pharmacokinetics and tumor delivery<br>MSCs prevent hepatic damage                                                                                             | Mahasa et al. (2020)           |
| MenSCs      | Ad (ICOVIR15)              | Modified E1a promoter, delta-24, RGD                                                                                   | Lung adenocarcinoma xenograft/nude mice                         | A549                    | ip single     | MOI used to infect MSCs has a critical impact in the therapy outcome<br>The most OAdv-MSCs used, the higher antitumor effect                                                     | Guo et al. (2019)              |
| MenSCs      | Ad (ICOVIR15)              | Modified E1a promoter, delta-24, RGD                                                                                   | Lung adenocarcinoma and epidermoid carcinoma xenograft/NSG mice | A549/A431               | ip single     | Correct viral infection and progeny production<br>Viral tumor delivery                                                                                                           | Moreno et al. (2017)           |
| MenSCs      | Ad (ICOVIR15-cBITE)        | Modified E1a promoter, delta-24, RGD, EGFR-targeting bispecific T-cell engager (cBITE)                                 | Lung adenocarcinoma xenograft/NSG mice                          | A549                    | ip single     | Tumor homing<br>MSCs shift towards a pro-inflammatory phenotype after OAdv infection                                                                                             | Moreno et al. (2019)           |
| MSCs        | HSV                        | -                                                                                                                      | Melanoma brain metastasi/SCID mice                              | MeWo/M12                | ica single    | OAdv-MSCs activate allogeneic T-cells and NK-cells<br>Benefits of using allogeneic MSCs in the presence of human immune system<br>OAdv tumor delivery                            | Barlabé et al. (2020)          |
| HU-MSCs     | Ad (AdAFPp-E1A-122)        | alpha-fetoprotein promoter, microRNA-122                                                                               | Orthotopic hepatocellular carcinoma/nude mice                   | HepG2                   | iv x2         | Higher antitumor effect than naked OAd<br>Tumor T-cell recruitment through cBITE production                                                                                      | Du et al. (2017)               |
| HU-MSCs     | Ad (Ad-hTERTp-IL24)        | deltaE1A, hTERT promoter, IL-24                                                                                        | Hepatocellular carcinoma xenograft/nude mice                    | HepG2                   | iv single     | Correct viral infection and progeny production<br>Brain tumor metastasis homing<br>Antitumor efficacy                                                                            | Yuan et al. (2016)             |
| BM-MSCs     | Ad (Ad5/3-TRAIL)           | delta-24, E3-deletion, 5/3 chimeric fiber, TRAIL                                                                       | xenograft/chick embryos                                         | MIA-PaCa2               | intramembrane | Tumor homing<br>MSCs prevent hepatic damage<br>Antitumor efficacy                                                                                                                | Li et al. (2016)               |
| FM-MSCs     | HSV (R-LM249)              | single-chain antibody to HER-2                                                                                         | Lung and brain metastases, nude/NSG mice                        | SK-OV-3, MDA-MB-453     | iv single     | Tumor migration<br>Tumor growth inhibition                                                                                                                                       | Kaczorowski et al. (2016)      |
| BM-MSCs     | Ad (ICOVIR15-Ad.iC9)       | Modified E1a promoter, delta-24, RGD iCaspase-9                                                                        | Lung cancer xenograft/SCID-beige mice                           | A549                    | iv single     | Tumor-specific migration<br>Tumor volume reduction                                                                                                                               | Leoni et al. (2015)            |
| BM-MSCs     | MV                         | -                                                                                                                      | lymphoblastic leukemia/SCID mice                                | Nalm-6                  | iv single     | Correct viral infection and progeny production<br>Anti-tumor activity against lung and brain metastasis                                                                          | Hoyos et al. (2015)            |
| BM-MSCs     | MV                         | -                                                                                                                      | Orthotopic hepatocellular carcinoma/SCID mice                   | Patient derived HCC     | iv single     | Enhanced tumor control and mice survival<br>Correct viral infection and progeny production                                                                                       | Castleton et al. (2014)        |
| BM-MSCs     | Ad (CRAAd-EGFP)            | E1B-55KD deletion                                                                                                      | Colon cancer xenograft/nude mice                                | HT29                    | ip single     | Tumor target in the present of anti-MV humoral immunity<br>Enhanced therapeutic efficacy in the presence of anti-MV antibodies                                                   | Ong et al. (2013)              |
| BM-MSCs     | Ad (delta-24-RGD)          | delta-24, RGD                                                                                                          | Glioma stem cells xenograft                                     | Glioma stem cells (GSC) | ica/ia single | Correct viral infection and progeny production<br>Tumor target in the present of anti-MV humoral immunity<br>Enhanced therapeutic efficacy in the presence of anti-MV antibodies | Huang et al. (2013)            |
| ASCs        | MV                         | -                                                                                                                      | Ovarian tumor xenograft/nude mice                               | SK-OV-3                 | ip single     | Hypoxic culture increases MSCs tumor migration via CXCR4 and CX3CR1<br>Hypoxic MSCs support CRAd replication<br>MSCs protect CRAd from anti-adenovirus NAb                       | Shinojima et al. (2013)        |
| BM-MSCs     | Ad (Ad-hOC-E1)             | bidirectional human osteocalcin promoter driving E1A and E1B genes                                                     | Orthotopic renal cell carcinoma/nude mice                       | RCC                     | ip single     | TGF-β mediates homing of MSCs to glioma<br>Survival enhanced                                                                                                                     | Mader et al. (2009, 2013)      |
| BM-MSCs     | Ad (Ad5/3-kBF512HRE-E1Awt) | secreted protein acidic and rich cystein (SPARC) promoter, hypoxia inducible factor (HIF) and NF-κB responsive motives | Melanoma xenograft/nude mice                                    | A375N                   | ro single     | MV infected MSCs increase survival in the presence of anti-MV immunity                                                                                                           | Hsiao et al. (2012)            |
| ASCs        | MYXV (vMyxgfp)             | green fluorescent protein                                                                                              | Orthotopic brain tumor/nude mice                                | U87                     | ic single     | A specific MSCs subpopulation described with enhanced tumor migration capacity (α 2,3 and 5-integrins overexpressed)<br>Inhibitory effect on tumor growth                        | Bolontrade et al. (2012)       |
| BM-MSCs     | Ad (delta-24-RGD)          | delta-24, RGD                                                                                                          | Intracranial glioma xenograft/nude mice                         | U87, U251-V121          | ica single    | Correct viral infection and progeny production<br>Viral tumor delivery                                                                                                           | Josiah et al. (2010)           |
| BM-MSCs     | Ad (Ad5.pK7-delta24)       | seven polylysines at the COOH terminus, delta-24                                                                       | Orthotopic lung and breast tumor/nude mice                      | LN35, M4A4-LM3          | iv single     | Enhanced therapeutic efficacy<br>Correct viral infection and progeny production                                                                                                  | Yong et al. (2009)             |
| hMSCs       | Ad (Ad5/3.CXCR4)           | CXCR4 promoter driving E1A, chimeric fiber 5/3                                                                         | Lung metastases, SCID mice                                      | MDA-MB-231              | iv single     | Viral tumor delivery<br>Tumor growth inhibition and improved survival                                                                                                            | Hakkaraianen et al. (2007)     |
|             |                            |                                                                                                                        |                                                                 |                         |               | Tumor growth inhibition and improved survival<br>Tumor-specific migration<br>Tumor growth reduction and improved mice survival                                                   | Stoff-Khalili et al. (2007)    |

BM-MSCs: bone marrow-MSCs; MenSCs: menstrual blood-derived MSCs; HU-MSCs: umbilical cord-derived MSCs; FM-MSCs: fetal membrane MSCs; ASCs: adipose-derived MSCs

MYXV: myxoma virus; Ad: adenovirus; OAd: oncolytic adenovirus; HSV: herpes simplex virus; MV: measles virus

iv: intravenous; ip: intraperitoneal; ica: intracardial; ia: intra-arterial; ro: retro-orbital; ic: intracranial

EGFR: epidermal growth factor receptor; NSG: NOD scid gamma; SCID: severe combined immunodeficient; HCC: hepatocellular carcinoma; NAb: neutralizing antibodies; PDGF-AA: platelet derived growth factor AA
