# Supplementary material for: Mesenchymal stem cells and oncolytic viruses: joining forces against cancer
Source: PubMed Central journal article supplement — J Immunother Cancer. 2021 Feb 8;9(2):e001684. doi: 10.1136/jitc-2020-001684 (PMC7871674; doi:10.1136/jitc-2020-001684), 2021-02-08
Supplement: jitc-2020-001684supp002.pdf [file jitc-2020-001684supp002.pdf]

**Table 2** Clinical trials using Mesenchymal Stem Cells as cell carrier for oncolytic viruses

| Identifier/Status                        | Study title                                                                                                                                                                                         | Indication                                                                          | MSCs source        | Oncolytic virus used                                                        | Route and dose used                                                                                                        | Reference                                          |
|------------------------------------------|-----------------------------------------------------------------------------------------------------------------------------------------------------------------------------------------------------|-------------------------------------------------------------------------------------|--------------------|-----------------------------------------------------------------------------|----------------------------------------------------------------------------------------------------------------------------|----------------------------------------------------|
| EudraCT number 2008-000364-16/Completed  | Compassionate use of Celyvir – autologous marrow-derived mesenchymal stem cells (MSCs) carrying an oncolytic adenovirus – for treating children with advanced metastatic neuroblastoma              | Pediatric advanced metastatic neuroblastoma                                         | Autologous BM-MSCs | Adenovirus (ICOVIR5)                                                        | iv 2-70 administrations; 0.1-5x10 <sup>6</sup> /Kg                                                                         | García-Castro et al. (2010)<br>Melen et al. (2016) |
| NCT01844661/Completed                    | Safety and efficacy of repeated infusion of CELYVIR in children and adults with metastatic and refractory tumors                                                                                    | Adult and pediatric patients with relapsed/refractory solid tumors                  | Autologous BM-MSCs | Adenovirus (ICOVIR5)                                                        | weekly (x6) iv infusions at a dose of 2 × 10 <sup>6</sup> cells/kg (children) or 0.5–1 × 10 <sup>6</sup> cells/kg (adults) | Ruano et al. (2020)                                |
| EudraCT number 2019-001154-26/Recruiting | Feasibility clinical trial of the combination of Alocelyvir with chemotherapy and radiotherapy for the treatment of children and adolescents with relapsed or refractory extracranial solid tumors. | Relapsed or refractory extracranial solid tumors in children and adolescents        | Allogeneic BM-MSCs | Adenovirus (ICOVIR5)                                                        | -                                                                                                                          | -                                                  |
| EudraCT number 2020-005207-39/Recruiting | Phase I/II study of alocelyvir in patients with metastatic uveal melanoma                                                                                                                           | Patients with metastatic uveal melanoma                                             | Allogeneic BM-MSCs | Adenovirus (ICOVIR5)                                                        | weekly (x8) iv administration of 0.5-1x10 <sup>6</sup> cells/Kg                                                            | -                                                  |
| NCT03896568/Recruiting                   | Oncolytic Adenovirus DNX-2401 in treating patients with recurrent high-grade glioma                                                                                                                 | Recurrent glioblastoma (GBM), gliosarcoma or wild-type IDH-1 anaplastic astrocytoma | Allogeneic BM-MSCs | Oncolytic Adenovirus Ad5-DNX-2401                                           | ia                                                                                                                         | Yong et al (2009)                                  |
| NCT02068794/Recruiting                   | MV-NIS infected Mesenchymal Stem Cells in treating patients with recurrent ovarian cancer                                                                                                           | Ovarian cancer                                                                      | ASCs               | Oncolytic Measles virus encoding thyroidal sodium iodide symporter (MV-NIS) | ip                                                                                                                         | Mader et al. (2013)                                |

BM-MSCs: bone marrow-MSCs; ASCs: adipose-derived MSCs; iv: intravenous; as: intra-arterial; ip: intraperitoneal
